# Supplementary material for: Vascular Lipidomic Profiling of Potential Endogenous Fatty Acid PPAR Ligands Reveals the Coronary Artery as Major Producer of CYP450-Derived Epoxy Fatty Acids
Source: Cells. 2020 Apr 29;9(5):1096. doi: 10.3390/cells9051096 (PMC7290345; doi:10.3390/cells9051096)
Supplement: Supplementary file 1 [file cells-09-01096-s001.pdf]

**Supplementary Materials:**

**Table S1.** Primer pairs.

|                                                                                        |                                                                                         |
|----------------------------------------------------------------------------------------|-----------------------------------------------------------------------------------------|
| <p>pVCAM-1</p> <p>CCATGGTGTCCCAGAACTTT</p> <p>TAACTGGGTCCTTGGGTGAG</p>                 | <p>pCD40L</p> <p>GTTTGCCGTCCTGTTGGTAT</p> <p>CTCTCTTTGCCATCCTCCTG</p>                   |
| <p>pICAM-1</p> <p>TGACCTCCAACATGGAAACA</p> <p>TCATCAGGAGCTGGGGATAG</p>                 | <p>CYP2J34</p> <p>TTFCTGGAACTGAGACAACG</p> <p>GGATGATGTTGCCCATTCTC</p>                  |
| <p>pTNF<math>\alpha</math></p> <p>TCCTCACTCACACCATCAGC</p> <p>TAGTCGGGCAGGTTGATCTC</p> | <p><math>\beta</math>-actin</p> <p>GACATCCGCAAGGACCTCTA</p> <p>ACATCTGCTGGAAGGTGGAC</p> |
| <p>pMCP-1</p> <p>CCGAAGCTTGAATCCTCATC</p> <p>TGCTGCTGGTGACTCTTCTG</p>                  |                                                                                         |

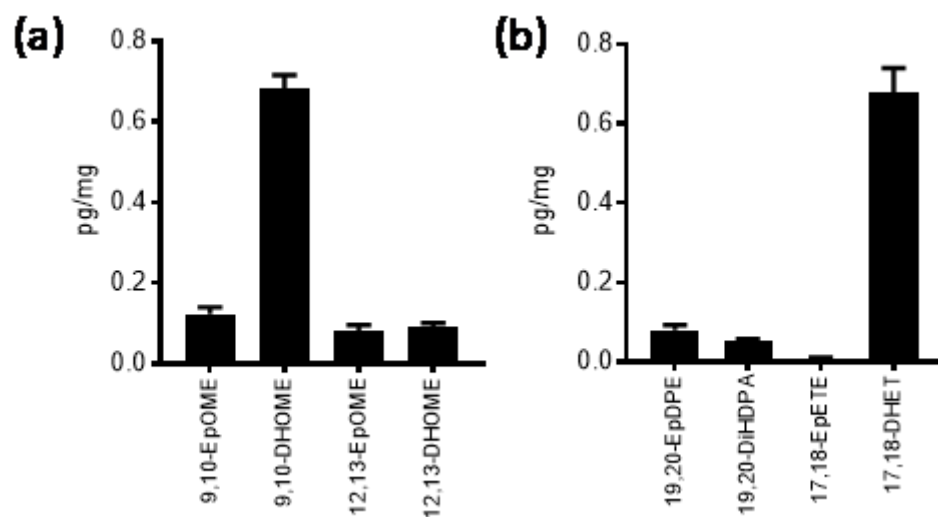

**Figure S1.** Aorta produces low but detectable levels of CYP-derived oxylipins. Figure shows detectable CYP epoxygenase LA (a) and DHA / EPA (b) products released by pig aorta. Oxylipins accumulated in 24 h serum free organ culture were measured by LC/MS/MS and expressed as pg/mg of wet tissue weight. Data represents organ culture from n = 3 separate animals.

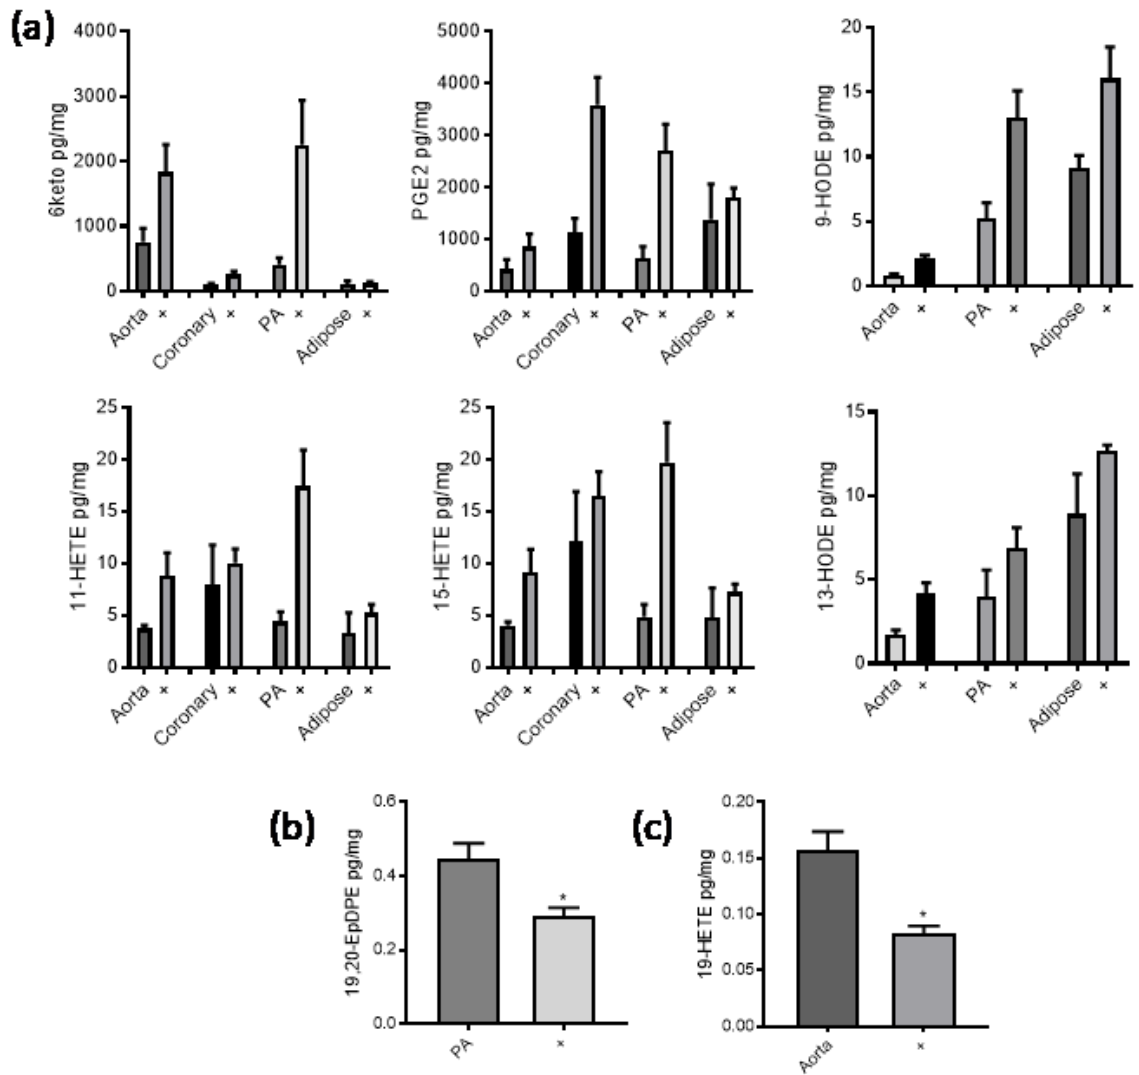

**Figure S2.** Regulation of oxylipin production in large vessels by LPS/TLR4 activation. **(a)** Comparison of major oxylipin production: 6-ketoPGF<sub>1α</sub>, PGE<sub>2</sub>, 11-HETE, 15-HETE, 9-HODE, 13-HODE, in aorta, coronary artery, pulmonary artery (PA) and aortic perivascular adipose treated in the absence (-) or presence regulation by LPS (1μg/ml; +). **(b)** 19,20-EpDPE production in pulmonary artery and **(c)** 19-HETE production in aorta, in the absence (-) or presence regulation by LPS (1μg/ml; +). Oxylipins are expressed as mean±s.e.m released in pg/mg tissue produced over 24 h. \* indicates p < 0.05 by unpaired t-test between tissue treated in the presence of absence of LPS. Data is organ culture from n=3 separate animals.
